# Supplementary material
Source: HighWire-hosted journal article supplement (https://qdcxjkg.com/highwire/filestream/114238/field_highwire_adjunct_files/3/Determinants_of_asthma_inhaler_adherence_in_adults_-_SM4_Study_quality_scores.pdf)
Supplement: Determinants_of_asthma_inhaler_adherence_in_adults_-_SM4_Study_quality_scores.pdf [file Determinants_of_asthma_inhaler_adherence_in_adults_-_SM4_Study_quality_scores.pdf]

## Determinants of asthma inhaler use in adults: systematic review of observational studies

### Supplementary material 4: Methods quality scores for the studies included.

| <i>Reference</i>            | Participant<br>s selection | Definition<br>of<br>variables | Measurem<br>ent of<br>variables | Addressin<br>g sources<br>of bias | Study size | Data<br>analysis |
|-----------------------------|----------------------------|-------------------------------|---------------------------------|-----------------------------------|------------|------------------|
| Tetersell (1993)            | 1                          | 0                             | 1                               | 1                                 | 0          | 1                |
| Bosley et al. (1995)        | 2                          | 2                             | 1                               | 3                                 | 0          | 2                |
| Apter et al. (1998)         | 2                          | 2                             | 3                               | 2                                 | 0          | 2                |
| Bennett et al. (1998)       | 1                          | 2                             | 2                               | 0                                 | 0          | 1                |
| Chambers et al., (1999)     | 3                          | 2                             | 1                               | 0                                 | 0          | 1                |
| Schmaling et al. (2000)     | 1                          | 2                             | 2                               | 0                                 | 0          | 2                |
| Horne & Weinman (2002)      | 3                          | 2                             | 3                               | 0                                 | 0          | 2                |
| van Schayck et al. (2002)   | 1                          | 1                             | 1                               | 0                                 | 2          | 1                |
| J Apter et al. (2003)       | 2                          | 2                             | 3                               | 2                                 | 0          | 2                |
| Jessop & Rutter (2003)      | 2                          | 2                             | 3                               | 0                                 | 1          | 2                |
| Labrecque et al. (2003)     | 3                          | 2                             | 3                               | 0                                 | 1          | 1                |
| Nishiyama & Chrystyn (2003) | 1                          | 1                             | 1                               | 0                                 | 0          | 1                |
| Balkrishnan et al. (2005)   | 3                          | 2                             | 2                               | 3                                 | 0          | 2                |
| Lacasse et al. (2005)       | 2                          | 2                             | 1                               | 2                                 | 2          | 1                |
| Stempel et al. (2005)       | 3                          | 2                             | 2                               | 0                                 | 1          | 2                |
| Bender et al. (2006)        | 3                          | 2                             | 3                               | 0                                 | 1          | 2                |
| Chatkin et al. (2006)       | 2                          | 1                             | 2                               | 0                                 | 1          | 1                |
| Hasegawa et al. (2006)      | 1                          | 1                             | 1                               | 0                                 | 0          | 1                |
| Marceau et al. (2006)       | 3                          | 2                             | 3                               | 0                                 | 1          | 3                |
| Ohm & Aaronson (2006)       | 3                          | 2                             | 3                               | 1                                 | 2          | 2                |
| Tavasoli et al. (2006)      | 1                          | 1                             | 1                               | 0                                 | 0          | 1                |

|                                                  |   |   |   |   |   |   |
|--------------------------------------------------|---|---|---|---|---|---|
| Ulrik et al. (2006)                              | 2 | 0 | 1 | 0 | 0 | 1 |
| Williams, Joseph, Peterson, Moon, et al. (2007)  | 3 | 2 | 3 | 1 | 1 | 3 |
| Williams, Joseph, Peterson, Wells, et al. (2007) | 3 | 2 | 3 | 1 | 1 | 3 |
| Breekveldt-Postma et al. (2008)                  | 3 | 2 | 3 | 0 | 1 | 3 |
| Janson et al. (2008)                             | 2 | 2 | 1 | 0 | 0 | 1 |
| Martínez-Moragón et al. (2008)                   | 2 | 2 | 2 | 0 | 0 | 1 |
| McGann et al. (2008)                             | 2 | 3 | 3 | 0 | 2 | 1 |
| Menckeberg et al. (2008)                         | 2 | 2 | 3 | 0 | 0 | 2 |
| Wells et al. (2008)                              | 3 | 2 | 2 | 1 | 1 | 3 |
| Axelsson et al. (2009)                           | 2 | 2 | 2 | 0 | 0 | 2 |
| Bae et al. (2009)                                | 2 | 1 | 1 | 0 | 0 | 1 |
| Laforest et al. (2009)                           | 2 | 2 | 1 | 0 | 0 | 1 |
| Ponieman et al. (2009)                           | 2 | 2 | 2 | 0 | 1 | 1 |
| Friedman et al. (2010)                           | 3 | 2 | 2 | 1 | 1 | 2 |
| Takemura et al. (2010)                           | 3 | 1 | 1 | 1 | 0 | 1 |
| Bolman et al. (2011)                             | 2 | 2 | 3 | 1 | 0 | 2 |
| Emilsson et al. (2011)                           | 1 | 2 | 2 | 0 | 0 | 1 |
| Small et al. (2011)                              | 2 | 1 | 2 | 2 | 0 | 2 |
| Suzuki et al. (2011)                             | 2 | 1 | 1 | 0 | 2 | 1 |
| Foster et al. (2012)                             | 1 | 1 | 1 | 1 | 0 | 1 |
| Ahmedani et al. (2013)                           | 2 | 2 | 2 | 2 | 0 | 2 |
| Axelsson et al. (2013)                           | 2 | 2 | 2 | 1 | 0 | 1 |
| Price, Lee et al. (2013)                         | 2 | 2 | 2 | 1 | 1 | 2 |
| Price, Thomas et al. (2013)                      | 3 | 2 | 2 | 2 | 1 | 3 |
| Schatz et al. (2013)                             | 2 | 1 | 2 | 1 | 0 | 2 |
| Wells et al. (2013)                              | 3 | 2 | 2 | 2 | 1 | 3 |
| Baddar et al. (2014)                             | 1 | 2 | 1 | 0 | 0 | 1 |

---

|                           |   |   |   |   |   |   |
|---------------------------|---|---|---|---|---|---|
| Federman et al. (2014)    | 3 | 3 | 2 | 1 | 0 | 2 |
| Taylor et al. (2014)      | 3 | 2 | 2 | 2 | 1 | 3 |
| Van Steenis et al. (2014) | 3 | 3 | 2 | 1 | 1 | 1 |

---

Note: Quality scores: 0- Unknown; 1- Low; 2- Medium; 3- High
